# Supplementary material for: Employment Experiences and Career Aspirations of Full-Time Male Postgraduate Nursing Students from the Perspective of Occupational Gender Segregation: A Qualitative Study
Source: Research Square preprint supplement (doi:10.21203/rs.3.rs-6619772/v1), 2025-06-30
Supplement: Supplementary file 1 [file 32e015915367728cbae40698.docx]

**Highlights**

• First qualitative study exploring employed male postgraduate nursing students’ experiences in China.

• Participants reported passive entry into nursing due to NCEE score transfers, with low initial professional identity.

• Dual pressures of clinical work and research expectations led to burnout and career dissatisfaction.

• Gender-based advantages (e.g., physical strength) coexisted with stigma and limited promotion pathways.

• Calls for policy interventions: clearer career trajectories, research support, and salary reforms to retain talent.
